# Supplementary material
Source: PubMed Central journal article supplement (PMC4434777)
Supplement: pnas.1416884112.sapp.pdf [file pnas.1416884112.sapp.pdf]

2 **Amplified Arctic warming by phytoplankton under**  
3 **greenhouse warming**

4  
5  
6 **Jong-Yeon Park<sup>1</sup>, Jong-Seong Kug<sup>2</sup>, Jürgen Bader<sup>1,3</sup>, Rebecca Rolph<sup>1,4</sup>, and Minho**  
7 **Kwon<sup>5</sup>**

8 <sup>1</sup>Max Planck Institute for Meteorology, Hamburg, Germany

9 <sup>2</sup>School of Environmental Science and Engineering, Pohang University of Science and Technology  
10 (POSTECH), Pohang, South Korea

11 <sup>3</sup>Uni Climate, Uni Research & the Bjerknes Centre for Climate Research, Bergen, Norway

12 <sup>4</sup>University of Hamburg, Klimacampus, Hamburg, Germany

13 <sup>5</sup>Korea Institute of Ocean Science and Technology, Ansan, South Korea

14  
15  
16 ***Direct biological impact on oceanic shortwave heating (OGCM Experiments)***

17 The bio-geophysical influence considered in this study is the role of marine phytoplankton  
18 in modifying the vertical distribution of oceanic shortwave heating. Phytoplankton and their  
19 derivatives are acknowledged to be important factors in determining the optical properties of  
20 ocean water, which leads to a surface warming and subsurface cooling through the increased  
21 attenuation of downwelling solar radiation<sup>1</sup>. This first-order biological heating change is  
22 quantitatively examined from a supplementary experiment using an ocean-only model coupled  
23 with a biogeochemical model. These are ocean and biogeochemical components of the fully  
24 coupled climate model, which is used in our main analysis. Here, the advantage of using an  
25 ocean-only model rather than a fully-coupled model is that the direct impact of biological  
26 heating can be estimated by excluding the secondary indirect impact caused by ocean-  
27 atmosphere interactions, which may mask or overshadow the direct biological heating effect<sup>2-</sup>

28 <sup>4</sup>. The boundary data for the ocean-only model experiment are the historical (1951-2010) winds  
29 provided by the National Centers for Environmental Prediction-National Center for  
30 Atmospheric Research (NCEP-NCAR) reanalysis <sup>15</sup> and the climatological heat fluxes from  
31 the Common Ocean-Ice Reference Experiment (CORE) data<sup>6</sup>. Two parallel runs are conducted  
32 by turning the biogeochemical model on and off, which is a similar set-up to that used in our  
33 main experiments. That is, interactive chlorophyll simulated from the biogeochemical model  
34 is used for the calculation of oceanic shortwave heating in one experiment (Ocean.ECO.on),  
35 whereas in the other experiment (Ocean.ECO.off), the chlorophyll is prescribed by setting it to  
36 zero, which mimics optically pure ocean water. In the Arctic region (0°-360°E; 65°~90°N), the  
37 vertical distribution of simulated chlorophyll shows its maximum concentration at around 50-  
38 m depth where both solar radiation and nutrients for phytoplankton growth are sufficient (green  
39 line in Fig. S1a). As widely known, such feature is the natural consequence of light-limited  
40 phytoplankton growth in the deep layer and nutrient-limited growth in the upper mixed layer<sup>7,8</sup>.  
41 The presence of phytoplankton in Ocean.ECO.on results in more shortwave heating in the  
42 upper ocean above 30-m depth and less heating below 30-m depth compared to Ocean.ECO.off  
43 (Fig. S1b). The total biological heating in the upper ocean is ~5.9 W/m<sup>2</sup>, which accounts for  
44 about 9% of total shortwave flux coming into Arctic Ocean. This is the basic assumption of  
45 phytoplankton-shortwave penetration feedback considered in our study.

46

47

#### 48 ***Global pattern of biologically-induced warming***

49 Two transient carbon dioxide (CO<sub>2</sub>) warming experiments with and without interactive  
50 bio-geophysical feedback (i.e. ECO.on and ECO.off, respectively) show that the simulated  
51 future surface warming is intensified in the experiment with interactive bio-geophysical  
52 feedback (Fig S2). The intensified surface warming is most prominent in the Arctic, the main

53 focus of this study, but there is also a modest warming in mid-latitude and tropics. Unlike the  
54 intensified Arctic warming that coincides with an increase in phytoplankton, the warming in  
55 low latitudes cannot be straightforwardly explained by the future phytoplankton change, owing  
56 to a decrease in phytoplankton over most of the subtropics and tropics. A detailed analysis of  
57 the source of the low latitudes warming is beyond the scope of this study, but we found that  
58 the warming in the low latitude is likely to be triggered by the Arctic warming. As shown in  
59 the time evolution of zonally-averaged difference in surface temperature between ECO.on and  
60 ECO.off, the Arctic warming seems to be followed by low latitudes warming (Fig. S3). This  
61 suggests that the intensified Arctic warming may not be triggered by a remote influence from  
62 low latitudes, but by a local process confined to Arctic regions.

63

64

### 65 *Seasonal variation in biologically-triggered Arctic climate change*

66 The intensified Arctic warming considering the future changes in chlorophyll is  
67 investigated on a seasonal time scale. The amplified surface warming in ECO.on than in  
68 ECO.off appears to be the strongest in winter season and the weakest in summer (Fig. S4). The  
69 warming pattern is tightly linked to the decline in sea ice concentration in the Arctic. The sea  
70 ice reduction largely occurs in regions where the surface warming is strong, particularly near  
71 the Kara Sea and Chukchi Sea in winter and spring (Fig. S5). These areas are generally the  
72 marginal regions of Arctic sea ice in these seasons. In summer and fall, however, most of the  
73 Arctic Ocean becomes an ice-free area under doubled CO<sub>2</sub>, and thus the additional sea ice  
74 decline by biological feedback appears over a wider area, but with a subtle decline in magnitude.  
75 One thing to note here is that although the amount of sea ice reduction is similar in both winter  
76 and spring, the surface warming is much stronger in winter than in spring. This is especially  
77 interesting because the stronger chlorophyll bloom in spring may trigger the stronger biological

78 warming in the ocean surface (Fig. S6b). The reason for the strong winter warming is that the  
79 ocean plays a role as a heat sink in summer, and as a heat source in winter. That is, in summer,  
80 the excess energy is used to warm the upper ocean and melt sea ice, but in winter, this heat is  
81 released to the atmosphere, and thus leads to a greater surface warming. The mechanism of the  
82 strong winter temperature response due to the seasonal reversal of atmosphere-ocean heat flux  
83 in Arctic is previously addressed in examining the role of sea ice in Arctic amplification or the  
84 atmospheric response to Arctic Sea ice loss<sup>9-11</sup>.

85

### 86 *Similar experiments using another climate model*

87 The robustness of the enhanced Arctic warming linked to the future phytoplankton change  
88 is further tested using another state-of-the-art climate model, the fully-coupled Max Planck  
89 Earth System model (MPI-ESM). With this model, we carried out two global warming  
90 experiments similar to our main experiments of GFDL CM2.1. The two warming experiments  
91 using MPI-ESM are also prescribed by CO<sub>2</sub> increased by 1% per year to double its initial  
92 concentration, and run for 100 years. To produce a simple representation of future  
93 phytoplankton change, we prescribed different optical types of water in the two warming  
94 experiments instead of using interactive and prescribed chlorophyll. That is, in one experiment,  
95 an optically clear water type is prescribed (which is comparable with the experiment ‘ECO.off’  
96 in the main manuscript) in regions where sea ice melts under CO<sub>2</sub> warming, compared to the  
97 present climate simulation, while in the other warming experiment, a ‘dirty’ water type is  
98 prescribed (which is comparable with ‘ECO.on’) in the same ice-melting regions. Here, the so-  
99 called Jerlov optical water type IA and water type III are used for the optically clean and dirty  
100 water, respectively<sup>15</sup>. The reasoning behind the setup of this supplementary experiment begins  
101 with the fact that when the sea ice retreats under an increasing CO<sub>2</sub> scenario and the ocean

102 surface beneath the ice is consequently exposed to shortwave radiation, phytoplankton have  
103 better light conditions for growth than before.

104 The differences in surface warming and sea ice concentration between the type IA and III  
105 experiment are found in Fig. S12. The increased water turbidity in sea-ice melting regions  
106 appears to cause a substantial additional warming in the Arctic. The magnitude of warming is  
107 similar to the biologically-induced Arctic warming shown in Fig. 2a in the main manuscript.  
108 Interestingly, the most prominent regions showing an increase in surface temperature and a  
109 decline in sea ice concentration can be found near the Kara Sea, which corresponds with the  
110 result from our main experiment. This result reaffirms our conclusion on the role of future  
111 phytoplankton change in amplifying future Arctic warming through the modification of oceanic  
112 optical property.

113 **References**

114

115 1 Lewis, M. R., Carr, M. E., Feldman, G. C., Esaias, W. & McClain, C. Influence of penetrating  
116 solar-radiation on the heat-budget of the equatorial Pacific-ocean. *Nature* **347**, 543-545  
117 (1990).

118 2 Loptien, U., Eden, C., Timmermann, A. & Dietze, H. Effects of biologically induced  
119 differential heating in an eddy-permitting coupled ocean-ecosystem model. *J. Geophys. Res.*  
120 **114**, C06011 (2009).

121 3 Manizza, M., Le Quéré, C., Watson, A. J. & Buitenhuis, E. T. Bio-optical feedbacks among  
122 phytoplankton, upper ocean physics and sea-ice in a global model. *Geophys. Res. Lett.* **32**  
123 (2005).

124 4 Park, J.-Y., Kug, J.-S., Seo, H. & Bader, J. Impact of bio-physical feedbacks on the tropical  
125 climate in coupled and uncoupled GCMs. *Clim. Dyn.*, 1-17 (2013).

126 5 Kalnay, E. *et al.* The NCEP/NCAR 40-year reanalysis project. *Bul. Am. Meteorol. Soc.* **77**,  
127 437-471 (1996).

128 6 Large, W. & Yeager, S. Diurnal to decadal global forcing for ocean and sea-ice models: The  
129 data sets and flux climatologies. (Natl. Cent. for Atmos. Res., Boulder, Colo, 2004).

130 7 Bienfang, P. & Gundersen, K. Light effects on nutrient-limited, oceanic primary production.  
131 *Marine Biology* **43**, 187-199 (1977).

132 8 Russell, F. S. The vertical distribution of plankton in the sea. *Biological Reviews and*  
133 *Biological Proceedings of the Cambridge Philosophical Society* **2**, 213-262 (1927).

134 9 Deser, C., Tomas, R., Alexander, M. & Lawrence, D. The Seasonal Atmospheric Response to  
135 Projected Arctic Sea Ice Loss in the Late Twenty-First Century. *J. Clim.* **23**, 333-351 (2010).

136 10 Screen, J. A. & Simmonds, I. The central role of diminishing sea ice in recent Arctic  
137 temperature amplification. *Nature* **464**, 1334-1337 (2010).

138 11 Tietsche, S., Notz, D., Jungclaus, J. H. & Marotzke, J. Recovery mechanisms of Arctic  
139 summer sea ice. *Geophys. Res. Lett.* **38** (2011).

140 12 Khodri, M. *et al.* Simulating the amplification of orbital forcing by ocean feedbacks in the last  
141 glaciation. *Nature* **410**, 570-574 (2001).

142 13 Manabe, S. & Wetherald, R. T. On the distribution of climate change resulting from an  
143 increase in CO2 content of the atmosphere. *J. Atmos. Sci.* **37**, 99-118 (1980).

144 14 Spielhagen, R. F. *et al.* Enhanced Modern Heat Transfer to the Arctic by Warm Atlantic  
145 Water. *Science* **331**, 450-453 (2011).

146 15 Jerlov, N. G. Marine optics. *Elsevier oceanogr* **14**, i-xiii,1-231 (1976).

147

148

149 **Table S1.** The length of open water season (unit: day) in different Arctic areas: Barents (30°-  
150 60°E, 65°-75°N), Kara (60°-90°E, 70°-80°N), Laptev (100°-150°E, 75°-80°N), Siberian (150°-  
151 180°E, 70°-80°N), and Chukchi (180°-170°W, 65°-75°N). The open water season is defined as  
152 the number of days when sea ice concentration is lower than 5%.

|          | ECO.off | ECO.on | ECO.on – ECO.off |
|----------|---------|--------|------------------|
| Barents  | 245     | 311    | +66              |
| Kara     | 141     | 163    | +22              |
| Laptev   | 100     | 103    | +3               |
| Siberian | 97      | 108    | +11              |
| Chukchi  | 153     | 172    | +19              |

153

154

155

156

157 **Figures**

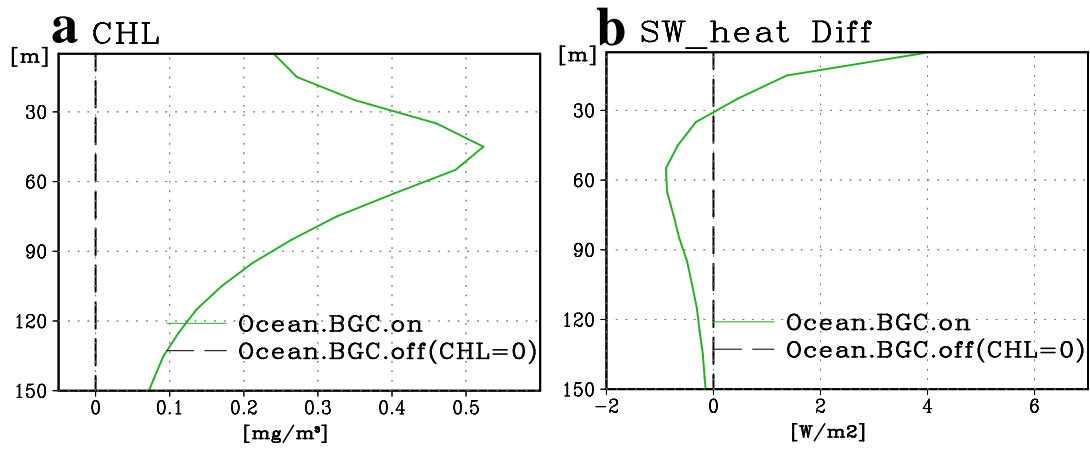

158

159 **Figure S1.** Vertical profile of chlorophyll (a) and oceanic shortwave heating (b) in Arctic (0-  
160 360°E; 65°-90°N) simulated in two experiments with and without chlorophyll, i.e.  
161 Ocean.ECO.on (green-solid line), and Ocean.ECO.off (black-dashed line). The  
162 shortwave heating in (b) is presented as the difference from Ocean.ECO.off.

163

164

165



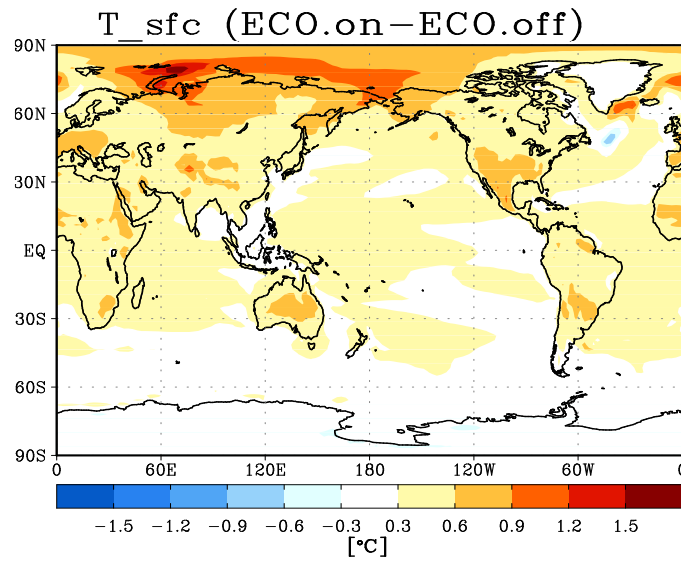

166

167 **Figure S2.** Five-member ensemble mean difference of surface temperature between two  
 168 experiments, ECO.on and ECO.off, with and without interactive biological  
 169 feedback to oceanic shortwave heating. This is the same as Figure 2a in the main  
 170 manuscript, but in a global map.

171

172

173

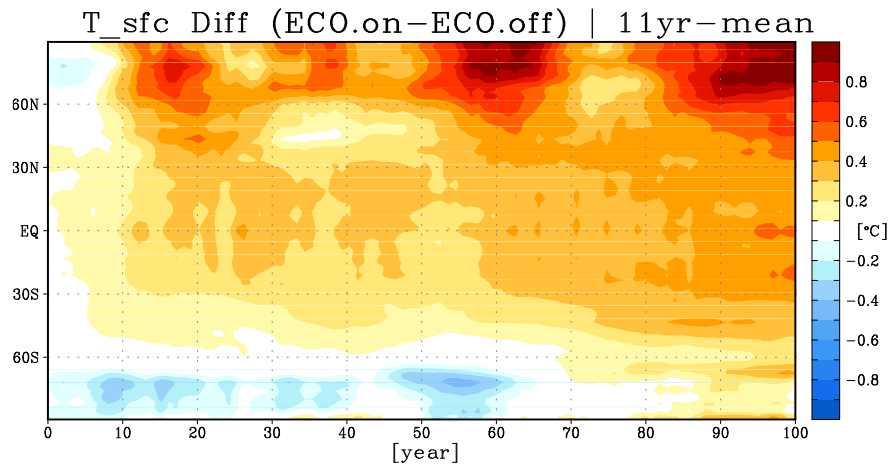

174

175 **Figure S3.** The time evolution of zonal mean (0-360°E) difference in surface temperature  
176 between ECO.on and ECO.off. The difference is calculated from five-member  
177 ensemble runs and smoothed using an eleven-year running mean.

178

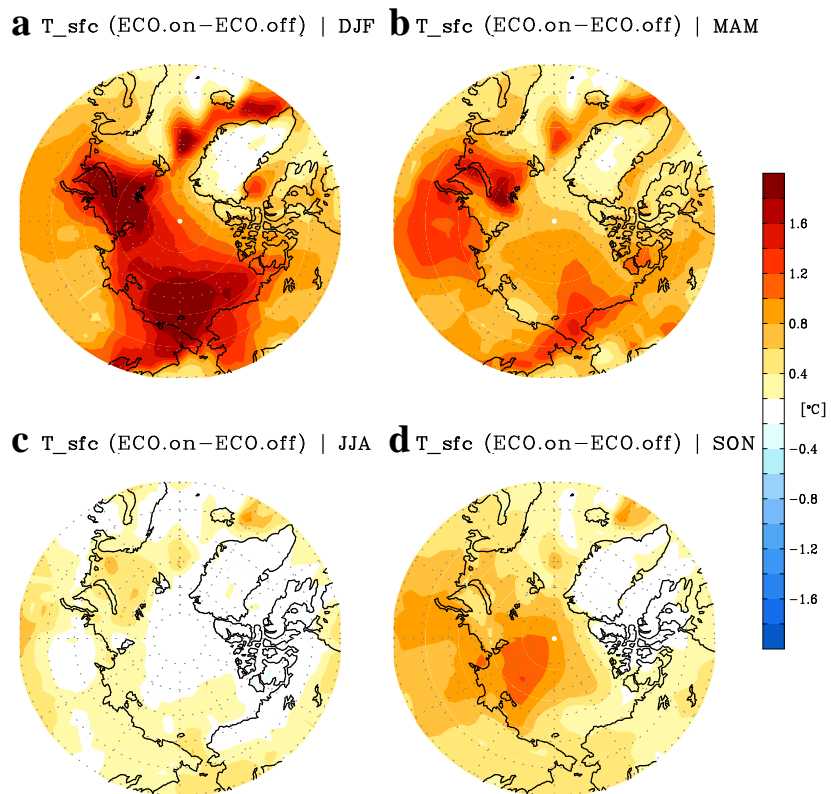

180

181 **Figure S4.** Difference in mean surface temperature between two CO<sub>2</sub> warming experiments  
182 with and without interactive bio-geophysical feedback in DJF (**a**), MAM (**b**), JJA  
183 (**c**), and SON (**d**).

184

185

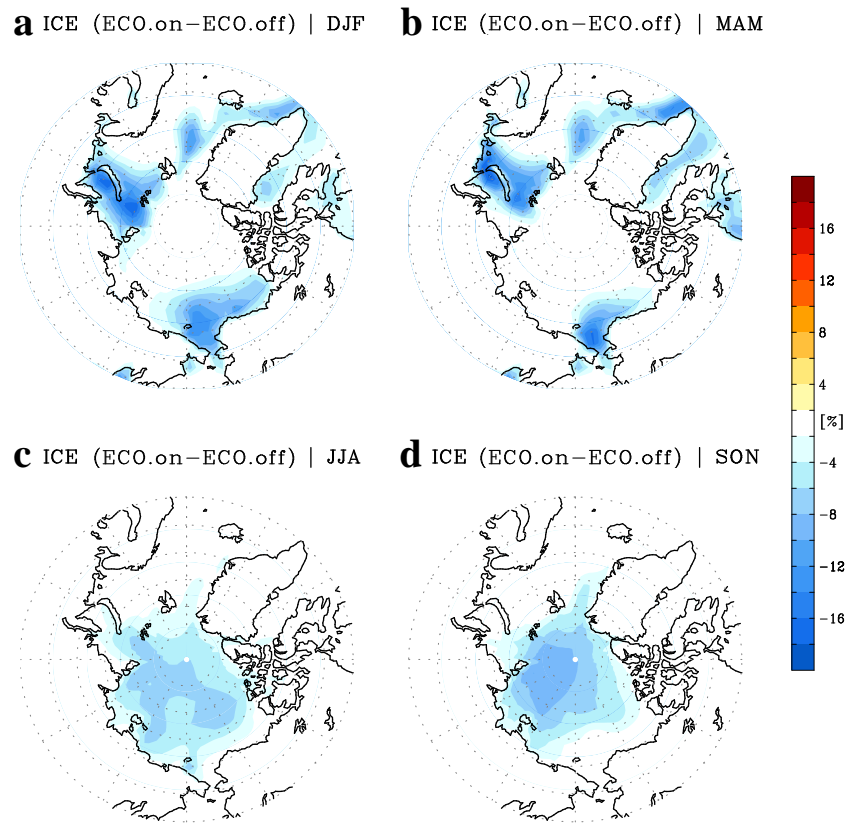

186

187 **Figure S5.** Same as Fig. S4 but for sea ice concentration.

188

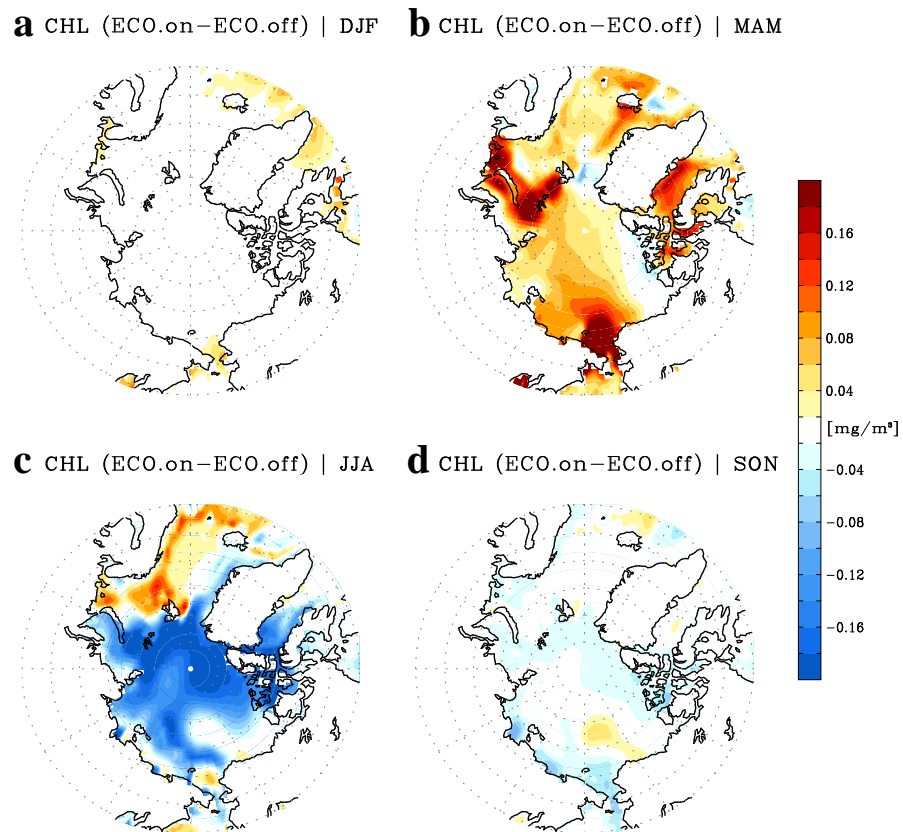

190

191 **Figure S6.** Same as Fig. S4 but for chlorophyll concentration averaged in the upper 30-m ocean.

192

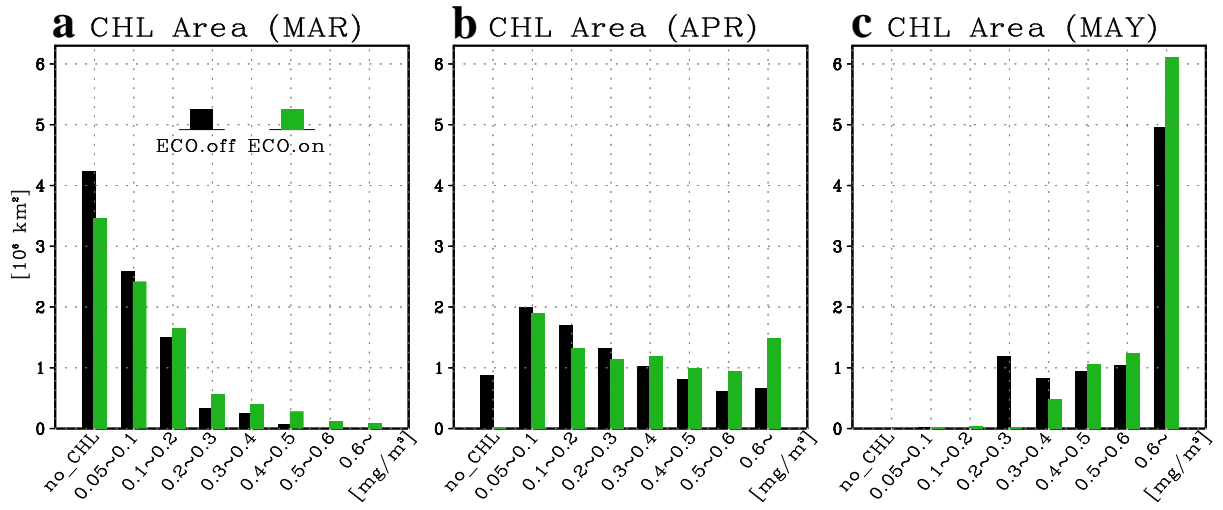

194

195 **Figure S7.** The area within different ranges of chlorophyll concentration in the Arctic (30°W-  
 196 210°E, 65°-90°N) simulated by ECO.off (black bar) and ECO.on (green bar).

197

198

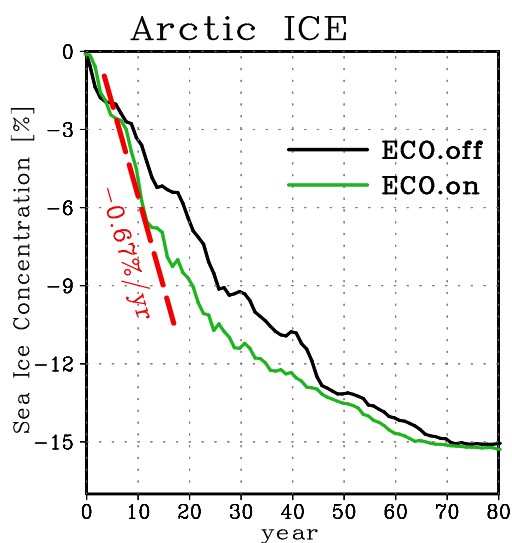

200

201 **Figure S8.** Time evolution of Arctic (0-360°E; 75°-90°N) sea-ice concentrations anomalies  
 202 (with respect to the long-term mean of present-day simulation, i.e.  
 203 ECO.on\_1xCO<sub>2</sub>) simulated by two warming climate simulations, ECO.off (black  
 204 line) and ECO.on (green line). Both simulations project the disappearance of  
 205 perennial sea ice after 70 years. The data are September mean values when sea-ice  
 206 coverage is at its minimum, and are smoothed using a 15-year running mean. The  
 207 red-dashed line represent the observed decline rate of Arctic sea-ice concentration  
 208 during 1990-2010.

209

210

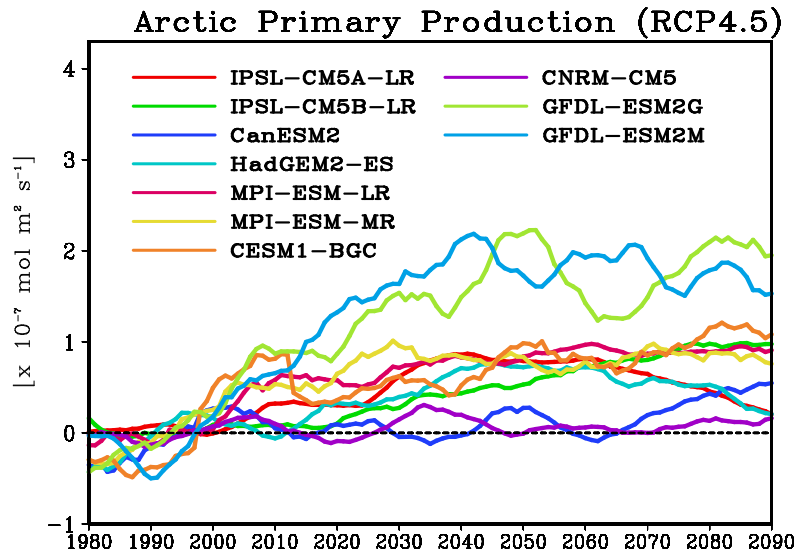

211

212 **Figure S9.** The anomalies of total primary (organic carbon) production by Arctic  
213 phytoplankton from 10 climate models in CMIP5. The anomalies are the  
214 differences from the 1980-2005 mean. The historical and a climate change scenario  
215 (the representative concentration pathway 4.5) are used. All the time series data  
216 are smoothed using a 15-year running mean and all available ensemble members  
217 are used for each model.

218



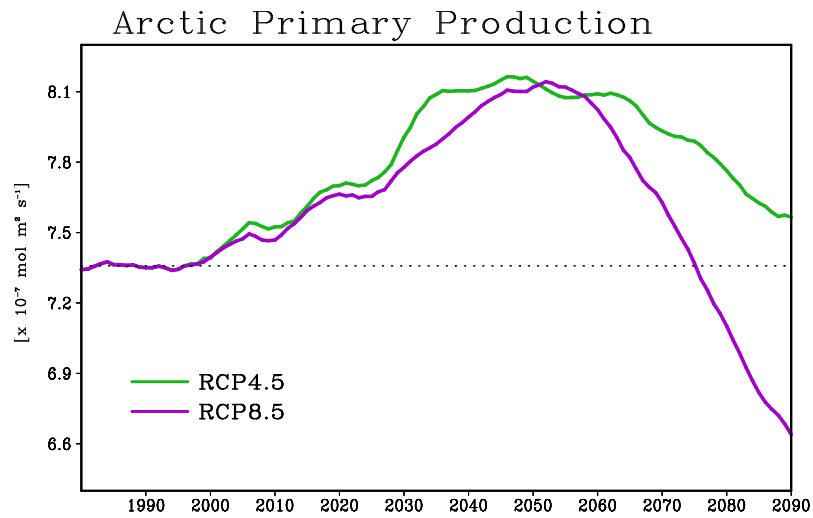

220

221 **Figure S10.** Temporal evolution of Arctic primary production in historical (6 ensemble mean)

222 and future scenario (4 ensemble mean) simulations from IPSL-CM5A-LR. The

223 green line represents the simulation under the representative concentration pathway

224 (RCP) 4.5, a modest climate change scenario, and the purple line represents the

225 RCP 8.5 simulation, the strongest climate change scenario in CMIP5. The dotted

226 line indicates the level of production in 1980-2000.

227

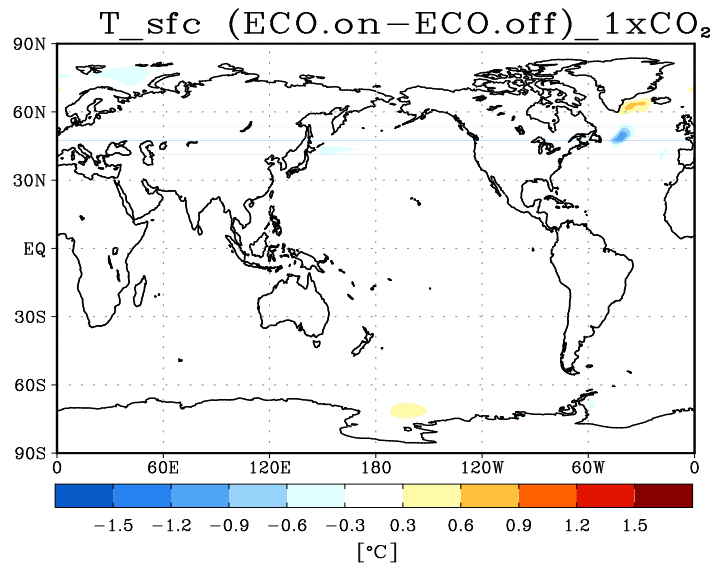

229

230 **Figure S11.** Mean difference of surface temperature between two 300-year-long present  
231 climate experiments, ECO.on\_1xCO2 and ECO.off\_1xCO2, with and without  
232 interactive bio-geophysical feedback.

233

234

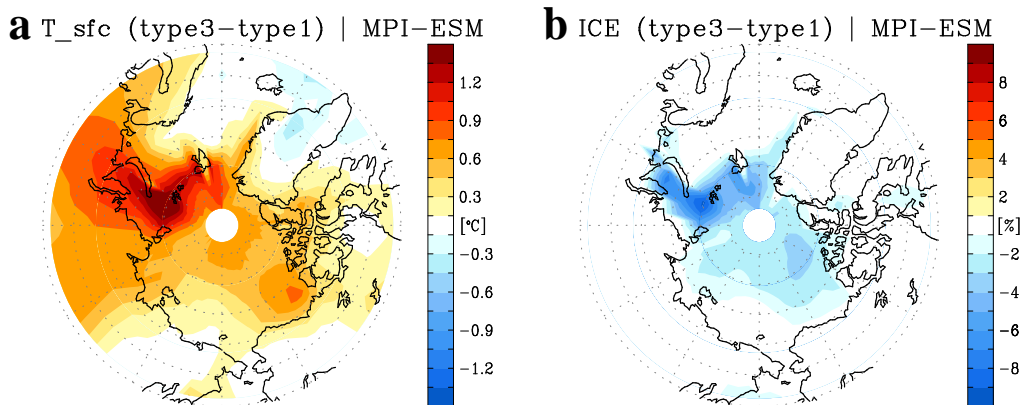

235

236 **Figure S12.** The annual mean difference of surface temperature **(a)** and sea ice concentration  
237 **(b)** between two supplementary CO<sub>2</sub> warming experiments prescribed by low and  
238 high turbidity of water in sea-ice melting regions. The experiments are conducted  
239 using MPI-ESM, and Jerlov optical water type IA and type III are prescribed.

240
